# Supplementary material for: Dosage-sensitivity shapes how genes transcriptionally respond to allopolyploidy and homoeologous exchange in resynthesized Brassica napus
Source: bioRxiv or medRxiv preprint supplement (doi:10.1101/2021.11.16.468838), 2023-06-12
Supplement: Supplementary file [file media-2.pdf]

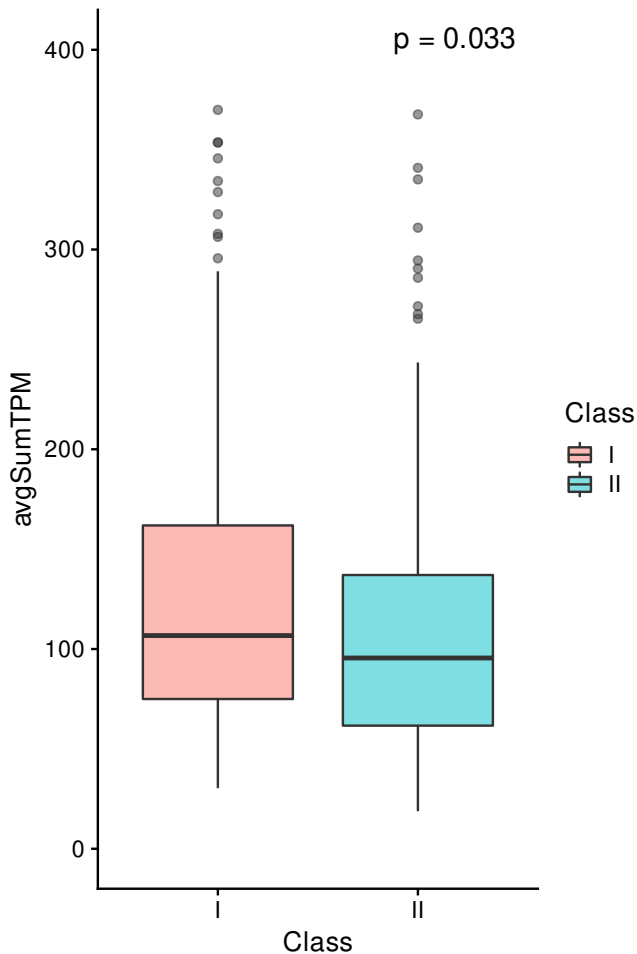

**Fig S7.** Comparison of average TPM of genes from Class I and II GO terms for homoeologous pairs that are affected by homoeologous exchange. P-value represents the results of a Kruskal-Wallis test
