# Supplementary material for: Dosage-sensitivity shapes how genes transcriptionally respond to allopolyploidy and homoeologous exchange in resynthesized Brassica napus
Source: bioRxiv or medRxiv preprint supplement (doi:10.1101/2021.11.16.468838), 2023-06-12
Supplement: Supplementary file [file media-9.pdf]

**BnC**

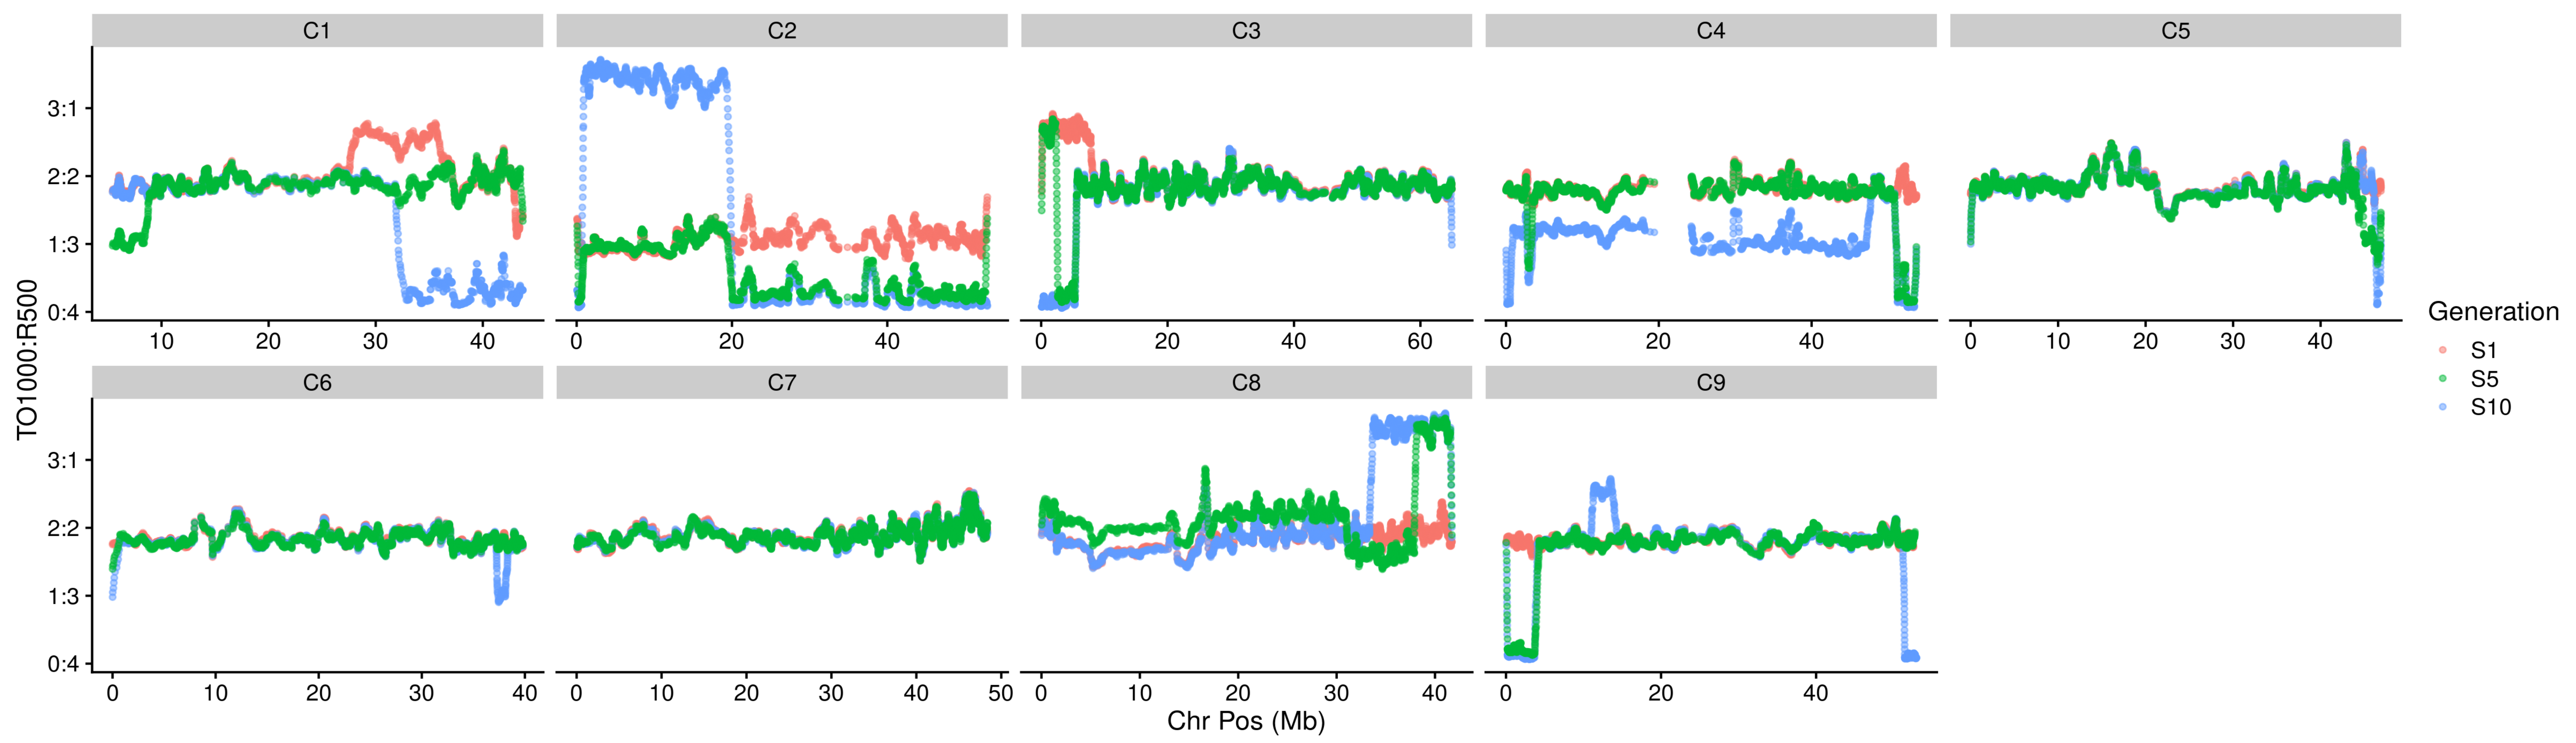

**BnA**

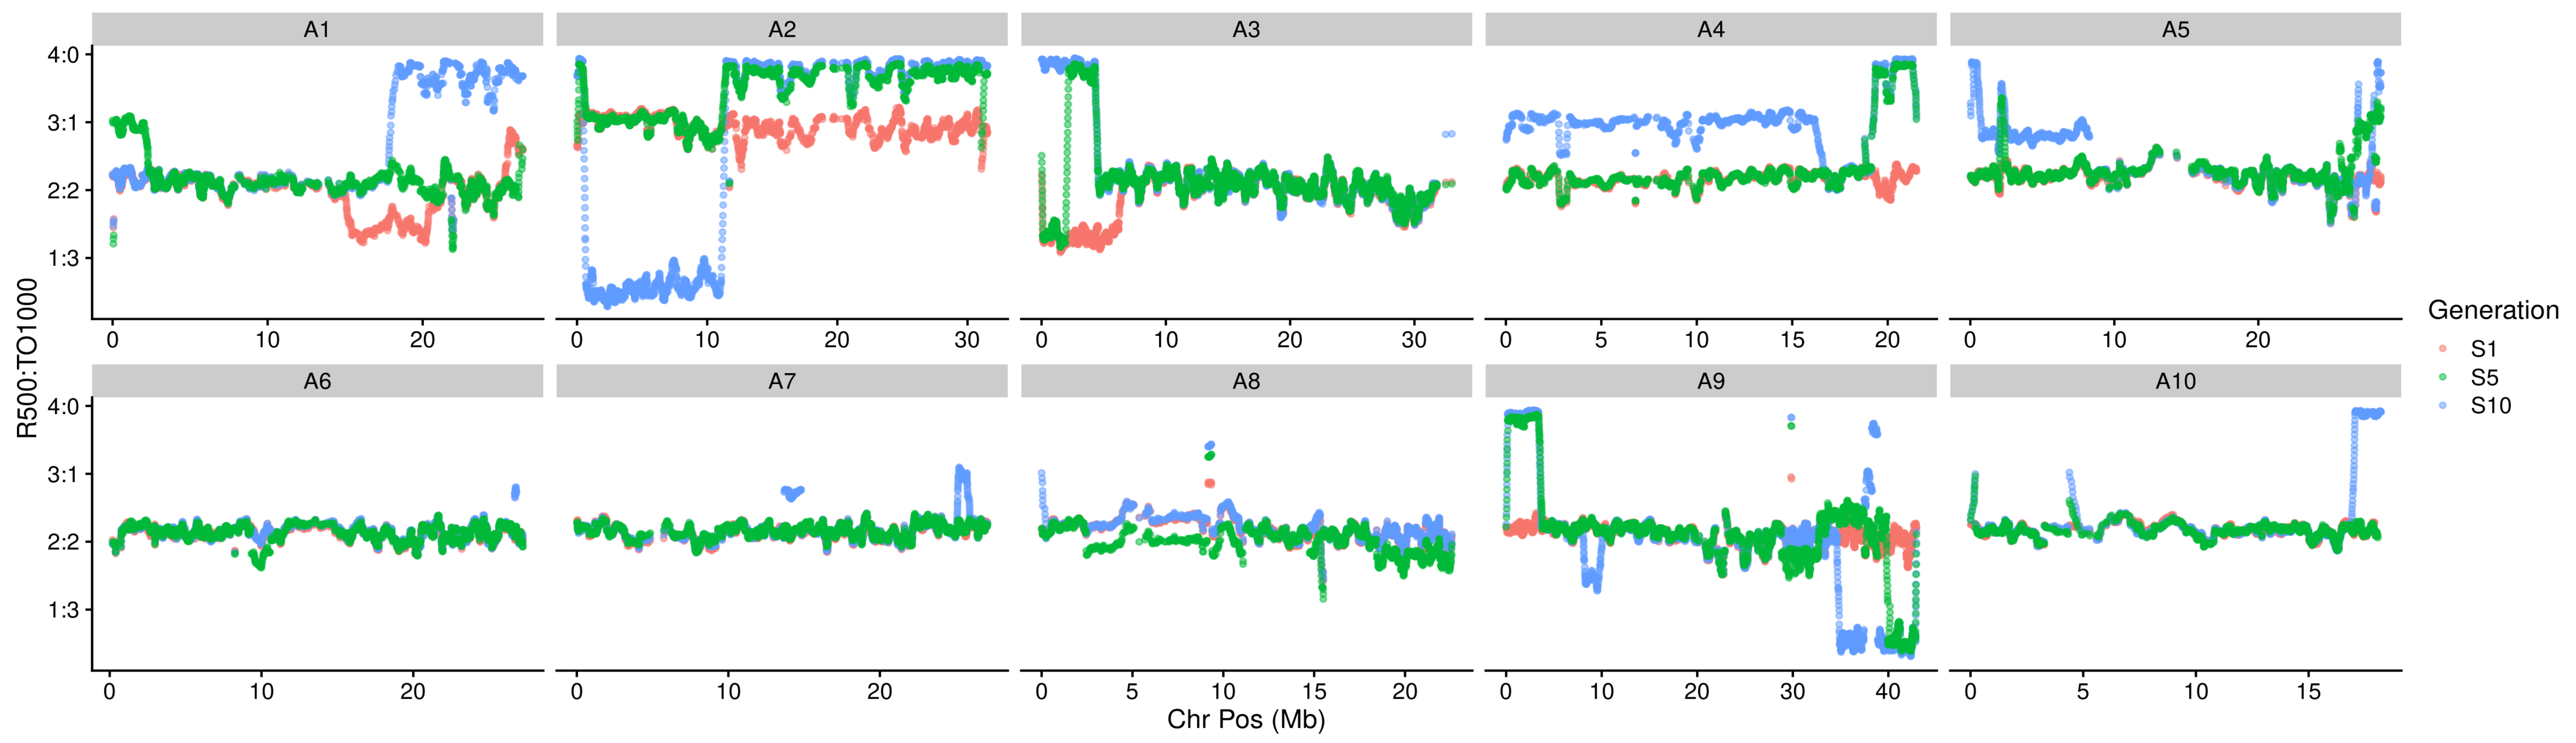

**Fig S6.** Mean read depth ratio of WGS reads for the BnC subgenome (above) and BnA subgenome (below) for individual EL1100. Values represent the rolling average of the read depth ratio over a 150 gene window. Regions such as chromosomes A1/C1 where long stretches of skewed read depth ratios were taken as evidence of larger genomic changes like aneuploidy or partial duplication and excluded from subsequent analyses
